# Supplementary material
Source: PubMed Central journal article supplement (PMC11028194)
Supplement: 262_2018_2120_MOESM1_ESM.pdf [file 262_2018_2120_MOESM1_ESM.pdf]

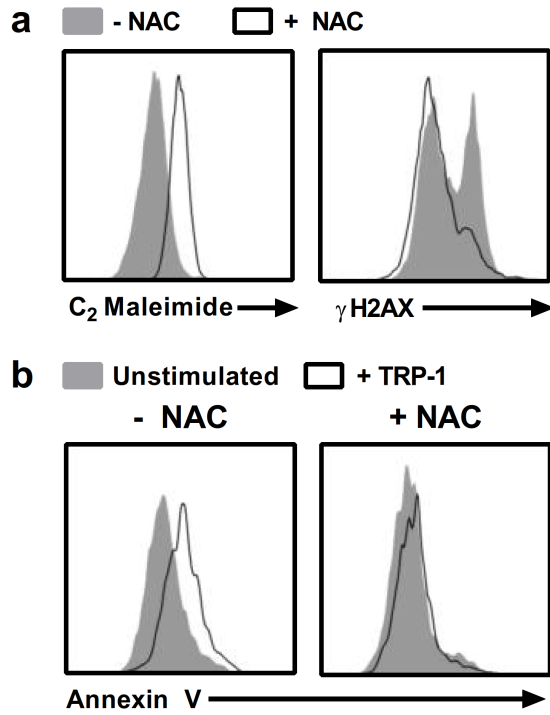

**Supplemental Figure 1. Murine TCR-engineered T cells expanded in NAC have an improved antioxidant capacity and are more resistant to DNA damage and AICD.** TRP-1 TCR transduced mouse splenocytes were expanded and restimulated. Vβ14<sup>+</sup>CD8<sup>+</sup> TRP-1 TCR transduced cells were analyzed for (a) surface thiols (left) and γH2AX expression (right) and (b) Annexin V staining. Histograms shown are representative of two independent experiments.

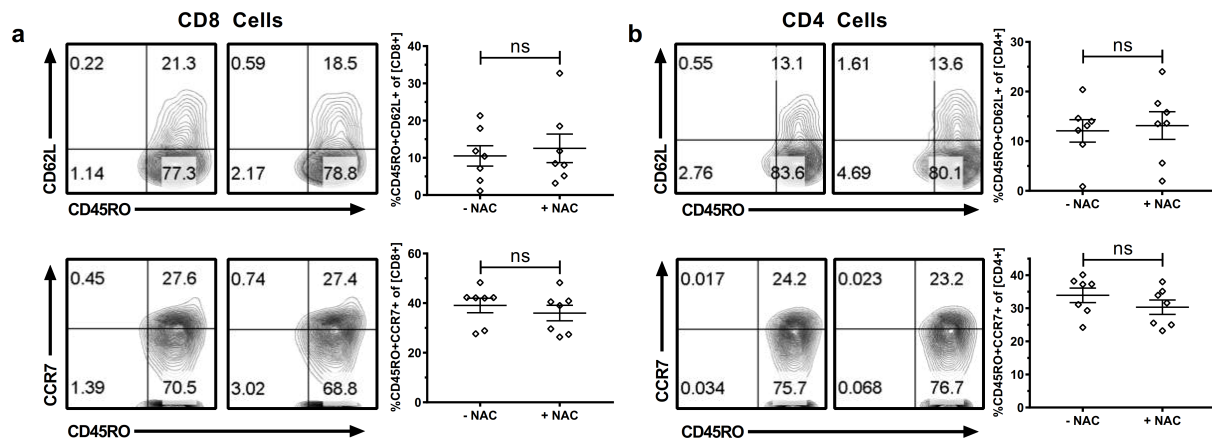

**Supplemental Figure 2. Expansion in NAC does not alter ratio of central and effector memory markers.** TIL1383I TCR transduced T cells rapidly expanded ( $\pm$  2mM NAC) were surface stained for expression of CD45RO, CD62L, and CCR7 and gated on either (a) CD8 or (b) CD4 cells. Left panels display representative contour plots. Right panels are quantification (mean  $\pm$  SEM) of n=7. ns=not significant

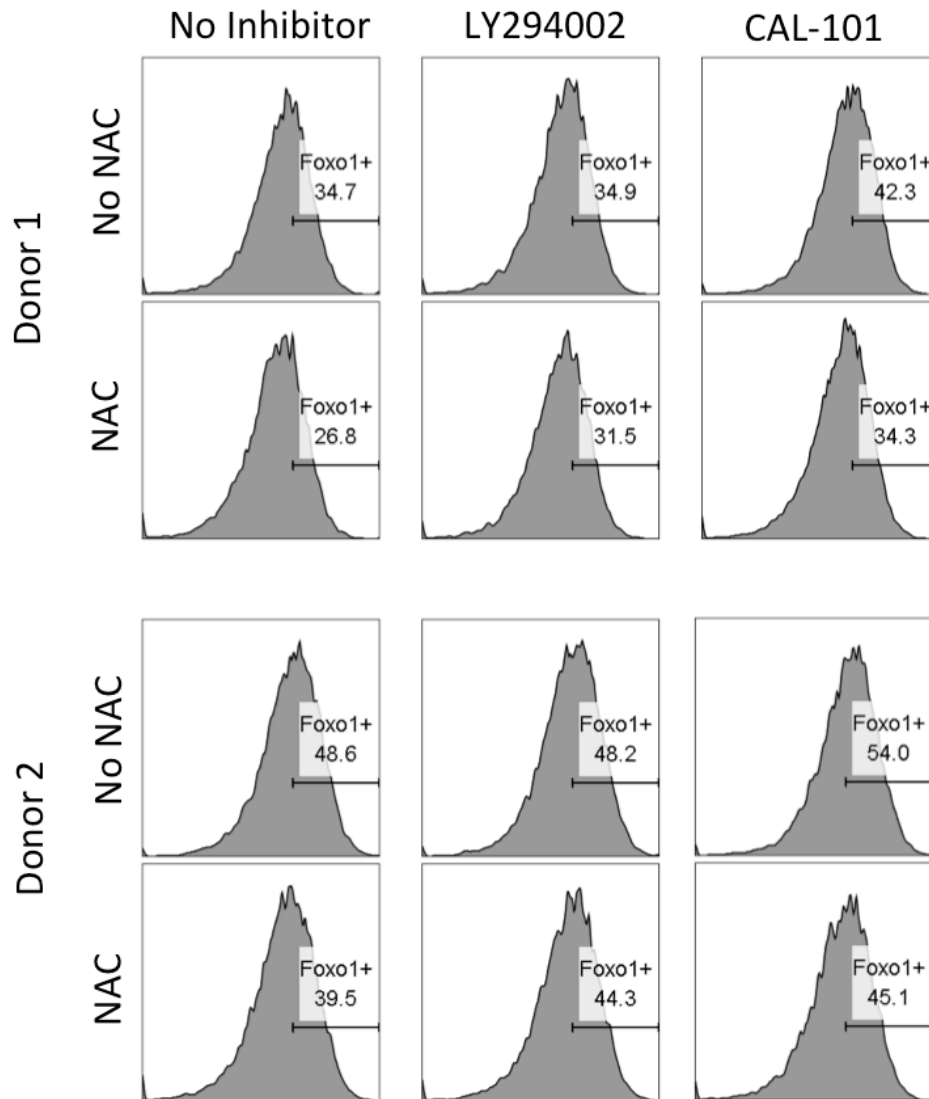

**Supplemental Figure 3. The NAC mediated reduction of Foxo1 is not dependent on PI-3Kδ.**

T cells were pretreated with either LY294002 (20 $\mu$ m) or CAL-101 (10 $\mu$ m) for 60 min prior to adding NAC (25mM) for an additional 60 min. Displayed are representative histograms of CD8<sup>+</sup> cells from 2 donors. Differences in Foxo1 staining (NAC minus no NAC) were  $8.5 \pm 0.85$  without inhibitor,  $3.65 \pm 0.35$  for LY294002, and  $8.45 \pm 0.63$  for CAL-101. The extent of Foxo1 degradation was significantly reduced with LY294002 ( $p < 0.05$ ), but not with CAL-101.
